# Supplementary material for: Cytogenomic Characterization of Giant Ring or Rod Marker Chromosome in Four Cases of Well-Differentiated and Dedifferentiated Liposarcoma
Source: Hindawi journal article supplement (doi:10.1155/2022/6341207), 2022-04-12
Supplement: f1 [file 6341207.f1.zip]

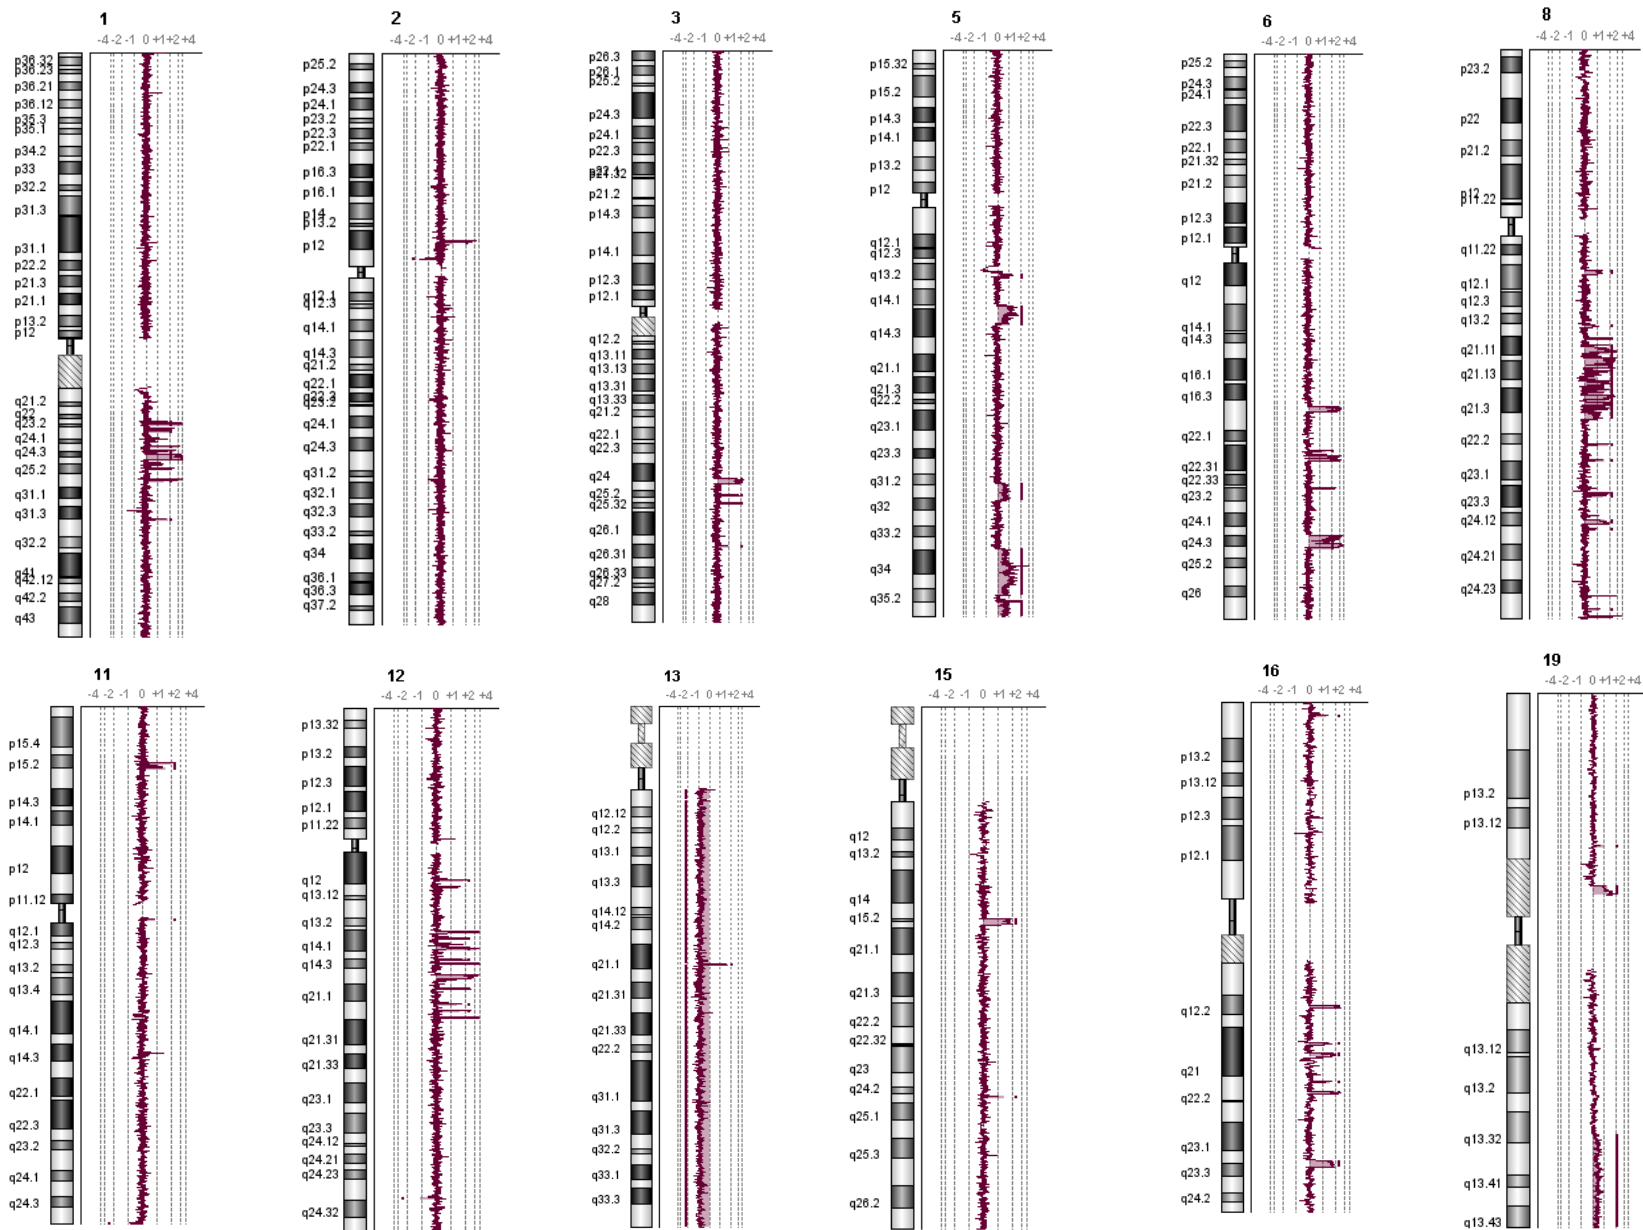

Supplemental Figure 1. Results of aCGH for case 2

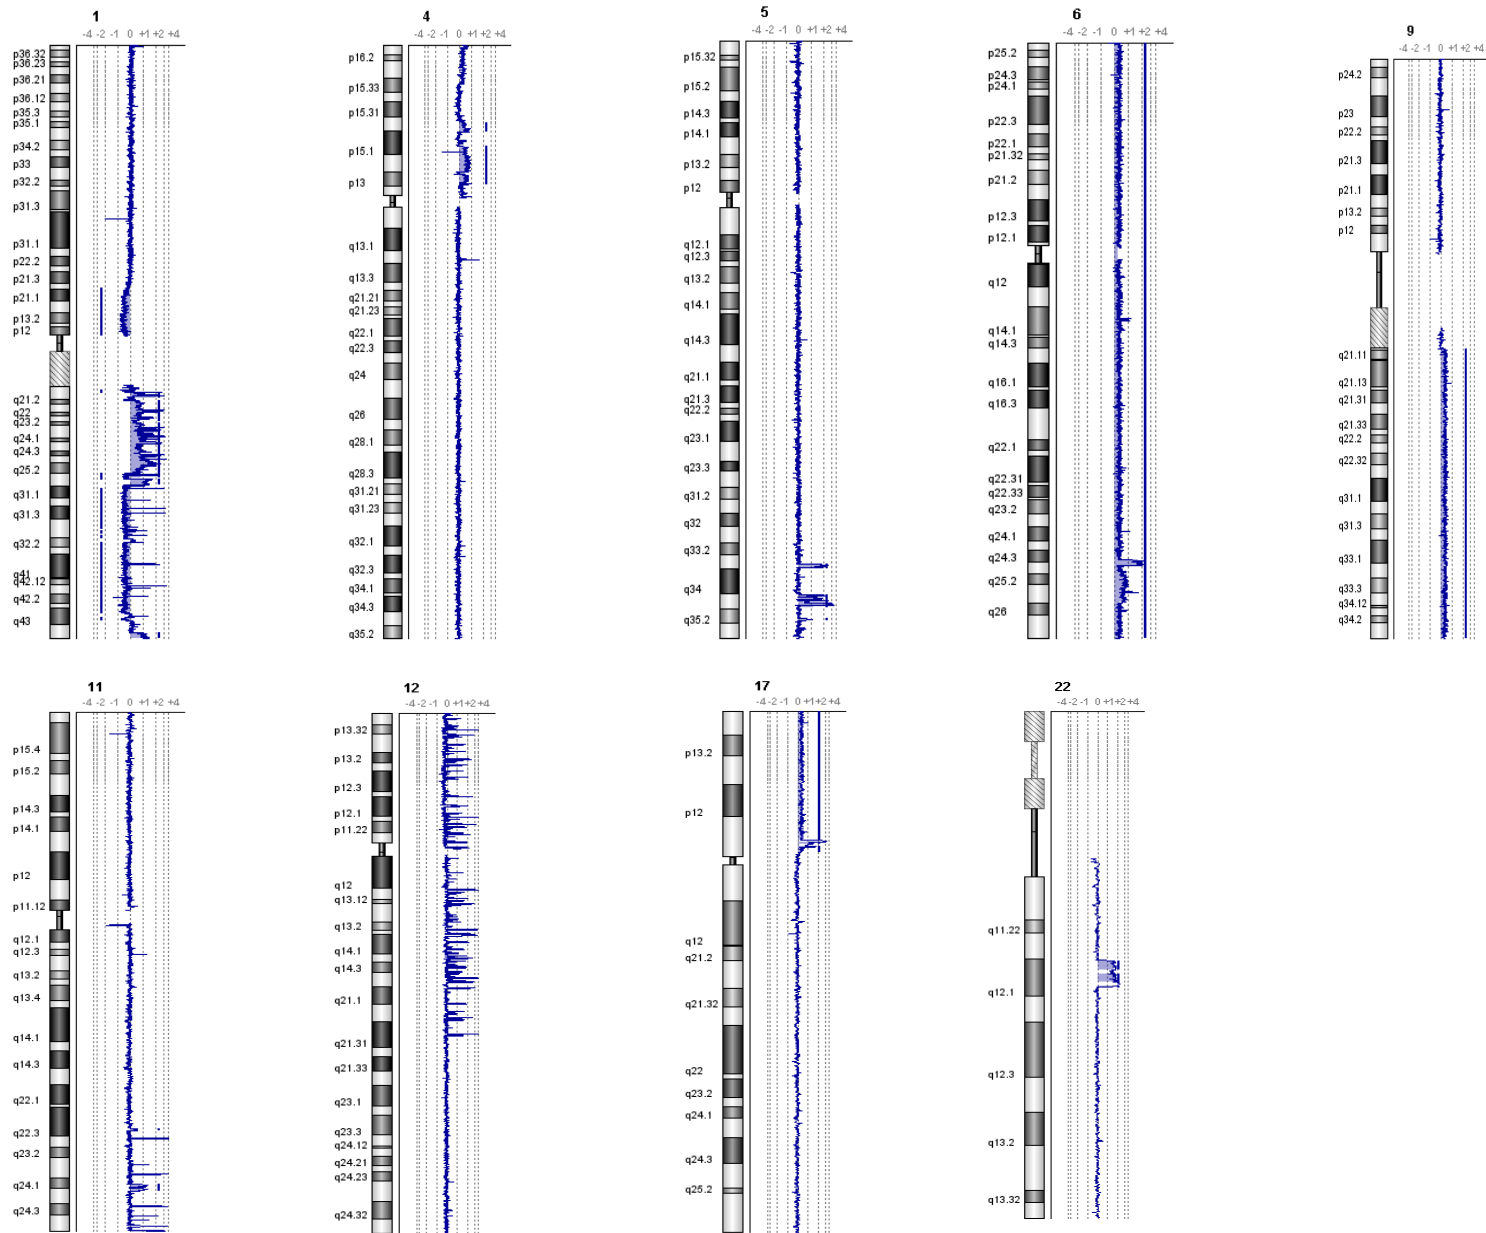

Supplemental Figure 2. Results of aCGH for case 3

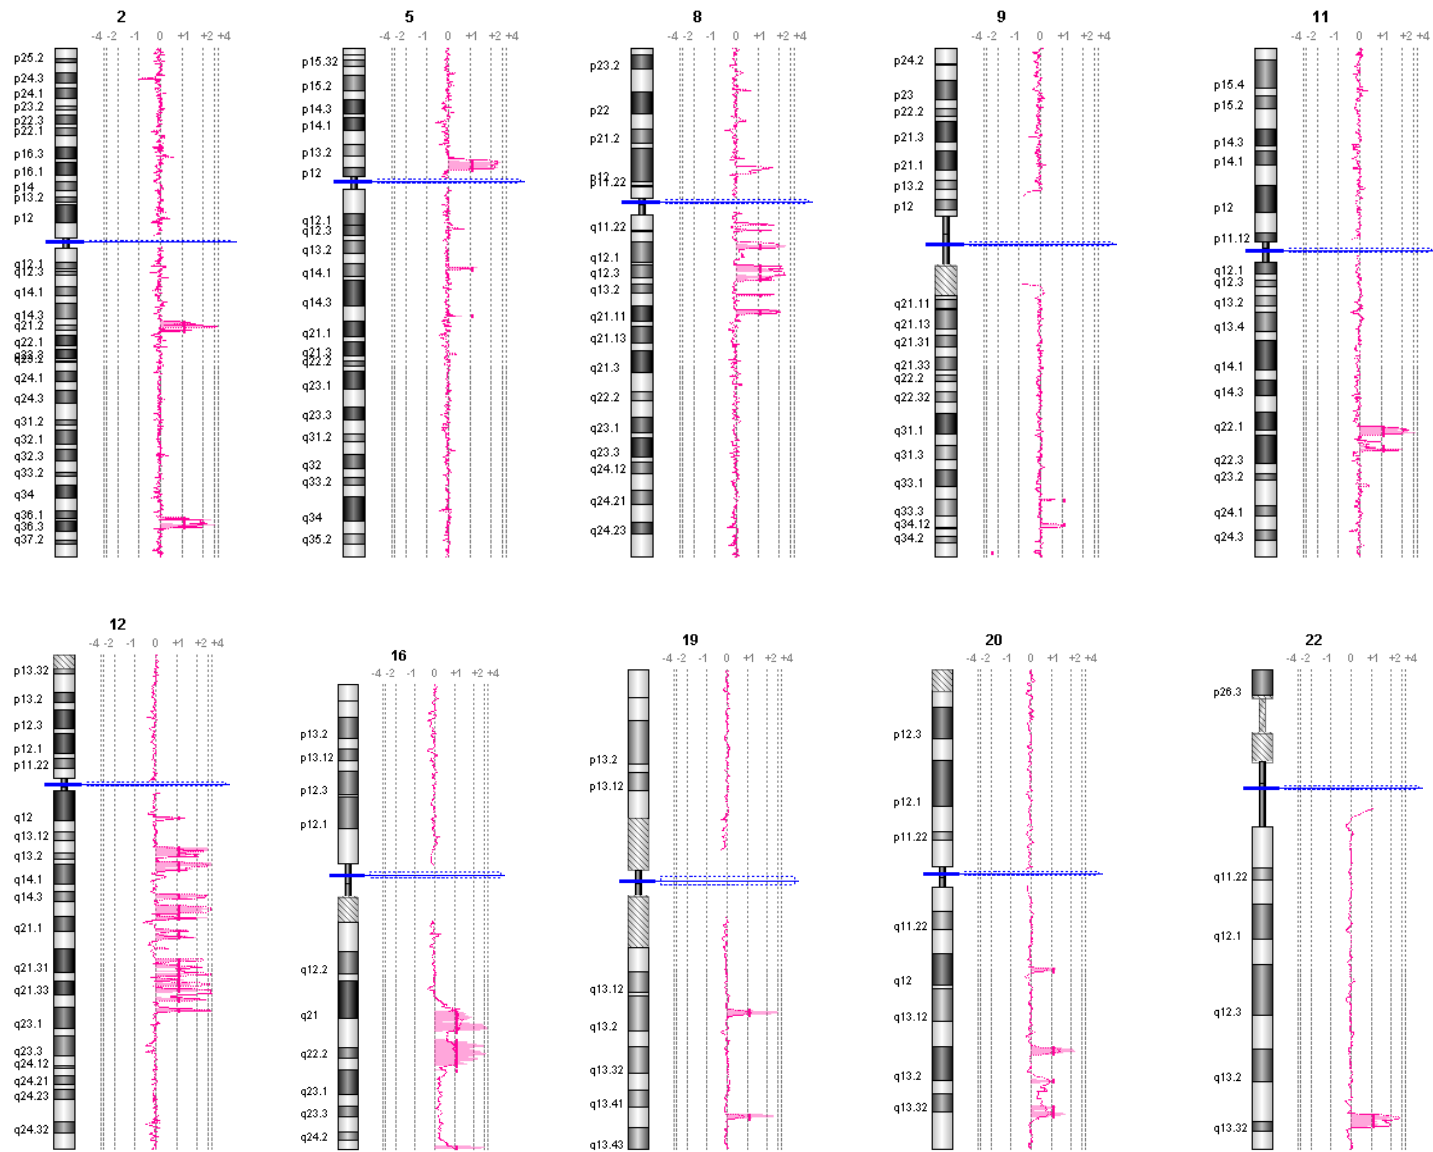

Supplemental Figure 3. Results of aCGH for case 4
